# Supplementary material
Source: publisher figshare collection journal article supplement (https://gsajournals.figshare.com/articles/dataset/_/6268955)
Supplement: Supplementary file 1 [file 1]

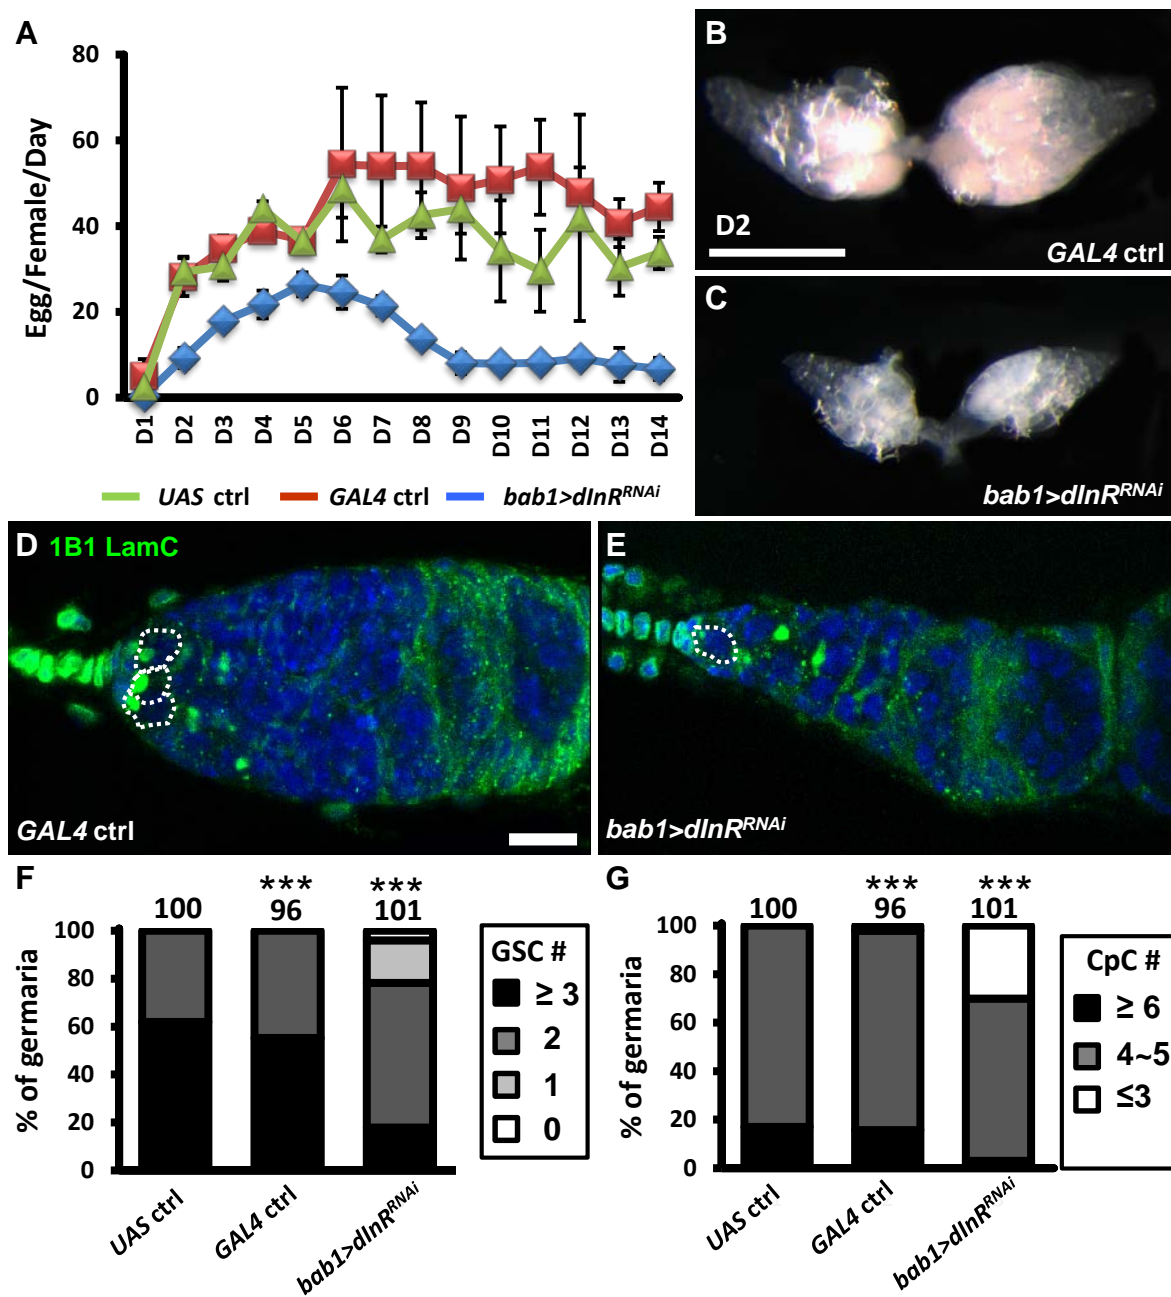

Supplementary Fig. 1

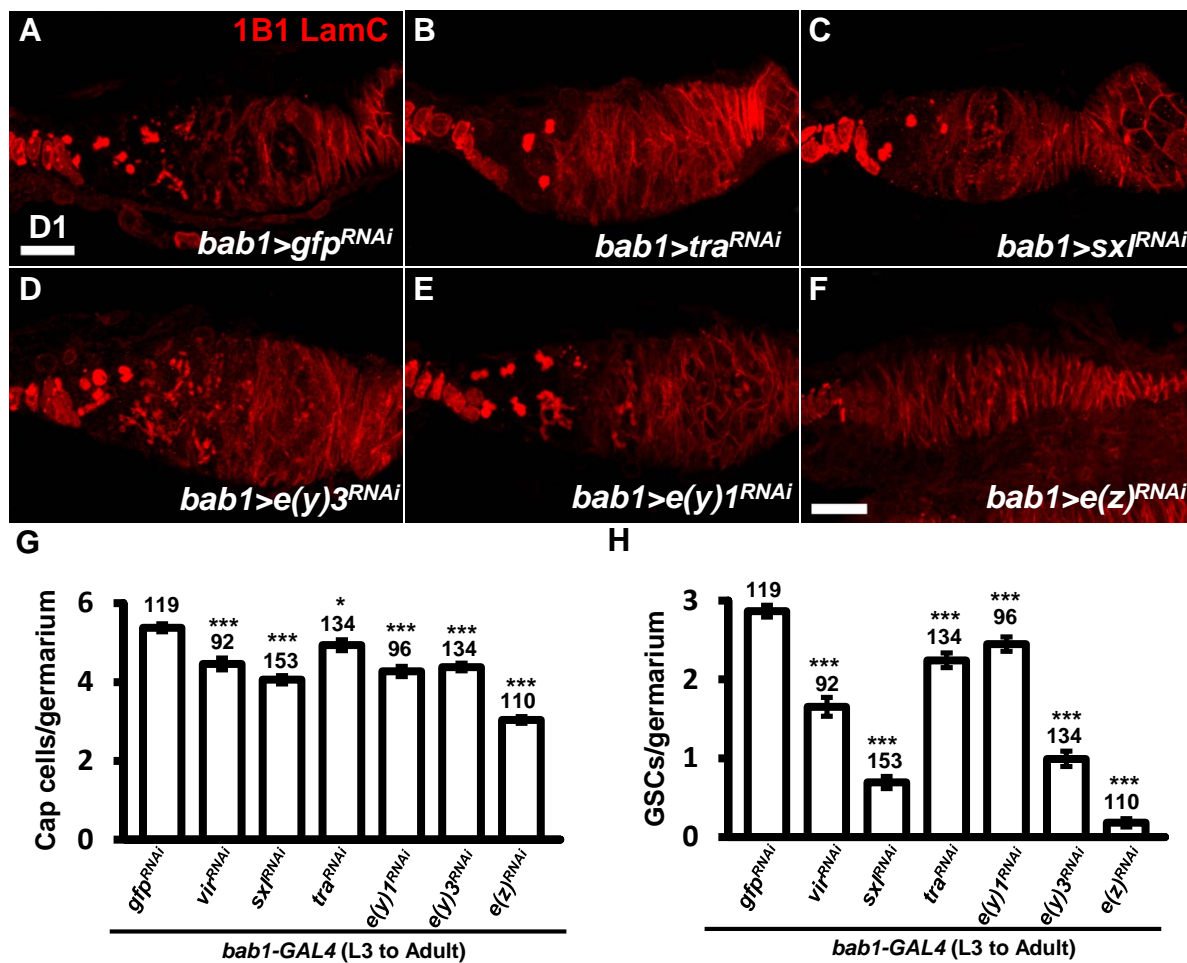

Supplementary Fig. 2

## SUPPLEMENTARY FIGURE LEGENDS

### **Supplementary Fig. 1 Insulin signaling functions in the developing soma to affect niche cap cell and GSC numbers, ovary size and egg production in the adult. (A)**

An egg laying assay was performed on 2-day (D)-old *GAL4* control (ctrl), *UAS* control and *bab1>dinr<sup>RNAi</sup>* females for two weeks. **(B and C)** Two-day-old *GAL4* control (B) and *bab1>dinr<sup>RNAi</sup>* ovaries (C) are shown. **(D and E)** One-day-old *GAL4* control (D) and *bab1>dinr<sup>RNAi</sup>* (E) germaria were stained for LamC (green, terminal filament and cap cell nuclear envelopes) and 1B1 (green, fusomes). **(F and G)** GSC (F) and cap cell (CpC) numbers in newly eclosed females. Number of germaria analyzed are shown above each bar. \*\*\* $P < 0.001$ . Dashed circles outline GSCs. *RNAi* was expressed throughout developmental stages (whole stage) at 29 °C. Scale bar in B is 50 mm, in D is 10 mm. The genotype of the *UAS* control is *UAS-dinr<sup>RNAi</sup>/+* and the *GAL4* control is *bab1-GAL4/+*.

### **Supplementary Fig. 2 Knockdown of *vir*, *tra*, *sxl*, *e(y)1*, *e(y)3* and *e(z)* in the soma**

#### **from the L3 to adult stage results in niche cap cell and GSC loss. (A-F)**

One-day-old germaria, expressing *RNAi* against *gfp*, *vir*, *tra*, *sxl*, *e(y)1*, *e(y)3* or *e(z)* by *bab1-GAL4*, were stained for 1B1 (red, fusomes) and LamC (red, terminal filament and cap cell nuclear envelopes). **(G and H)** Average number of niche cap cells (G) and GSCs (H) in the germarium were calculated. Number of germaria analyzed are shown above

each bar. \* $P < 0.05$ , \*\*\* $P < 0.001$ . Error bar, SEM. Scale bar, 10  $\mu\text{m}$ .
