# Supplementary material
Source: publisher figshare collection journal article supplement (https://gsajournals.figshare.com/articles/dataset/_/6268955)
Supplement: Supplementary file 1 [file 1]

| **Supplementary Table 1. RNAi lines form the NIG-fly stock center used in the screen for identifying factors involved in niche formation.** | | | | | | | | | | | |
| --- | --- | --- | --- | --- | --- | --- | --- | --- | --- | --- | --- |
| RNAi target gene | Stock number | Candidatesǂ | | | | | Lethal induced by *bab1-GAL4* driven at 29°C | | | | |
| *bowl* | 10021R-2 |  | | | | | x | | | | |
|  | 10021R-3 |  | | | | | x | | | | |
| *tj* | 10034R-1 | X | | | | |  | | | | |
|  | 10034R-2 | X | | | | |  | | | | |
| *spir* | 10076R-2 |  | | | | |  | | | | |
| *Egfr* | 10079R-2 |  | | | | |  | | | | |
| *zpg* | 10125R-1 |  | | | | |  | | | | |
|  | 10125R-2 |  | | | | |  | | | | |
| *BEAF-32* | 10159R-1 |  | | | | |  | | | | |
|  | 10159R2 |  | | | | |  | | | | |
| *Rm62* | 10279R-1 |  | | | | |  | | | | |
|  | 10279R-2 |  | | | | | x | | | | |
| *abd-A* | 10325R-2 | X | | | | |  | | | | |
|  | 10325R-3 | X | | | | |  | | | | |
| *Grip71* | 10346R-1 |  | | | | |  | | | | |
| *Hmgcr* | 10367R-1 |  | | | | |  | | | | |
|  | 10367R-3 |  | | | | |  | | | | |
| *Hrb27C* | 10377R-1 |  | | | | |  | | | | |
| *bam* | 10422R-1 |  | | | | |  | | | | |
|  | 10422R-2 |  | | | | |  | | | | |
| *hkl* | 10473R-1 |  | | | | |  | | | | |
|  | 10473R-3 |  | | | | |  | | | | |
| *Dox-A2* | 10484R-2 |  | | | | |  | | | | |
|  | 10484R-3 |  | | | | |  | | | | |
| *sti* | 10522R-1 |  | | | | |  | | | | |
|  | 10522R-2 |  | | | | |  | | | | |
| *park* | 10523R-1 |  | | | | |  | | | | |
|  | 10523R-2 |  | | | | |  | | | | |
| *S6k* | 10539R-2 |  | | | | |  | | | | |
|  | 10539R-3 |  | | | | |  | | | | |
| *ara* | 10571R-2 |  | | | | |  | | | | |
|  | 10571R-3 |  | | | | |  | | | | |
| *CG10575* | 10575R-2 |  | | | | |  | | | | |
|  | 10575R-3 |  | | | | |  | | | | |
| *MED31* | 1057R-1 |  | | | | |  | | | | |
|  | 1057R-2 |  | | | | | x | | | | |
| *Orc1* | 10667R-1 |  | | | | |  | | | | |
|  | 10667R-3 |  | | | | |  | | | | |
| *Tdc2* | 10687R-1 |  | | | | | x | | | | |
|  | 10687R-3 |  | | | | | x | | | | |
| *Ddc* | 10697R-1 |  | | | | |  | | | | |
|  | 10697R-2 |  | | | | |  | | | | |
| *brat* | 10719R-1 |  | | | | |  | | | | |
|  | 10719R-2 |  | | | | | x | | | | |
| *E2f2* | 1071R-1 |  | | | | |  | | | | |
|  | 1071R-2 |  | | | | |  | | | | |
| *dnc* | 10792R-1 |  | | | | |  | | | | |
|  | 10792R-3 |  | | | | |  | | | | |
| *Rheb* | 1081R-2 |  | | | | | x | | | | |
|  | 1081R-4 |  | | | | |  | | | | |
| *dyn-p25* | 10846R-1 |  | | | | |  | | | | |
|  | 10846R-2 |  | | | | |  | | | | |
| *enc* | 10847R-2 |  | | | | |  | | | | |
|  | 10847R-3 |  | | | | |  | | | | |
| *ida* | 10850R-1 |  | | | | |  | | | | |
|  | 10850R-3 |  | | | | |  | | | | |
| *orb* | 10868R-1 |  | | | | |  | | | | |
|  | 10868R-5 |  | | | | |  | | | | |
| *osk* | 10901R-1 |  | | | | |  | | | | |
|  | 10901R-2 |  | | | | |  | | | | |
| *CG34346* | 11075R-1 |  | | | | |  | | | | |
|  | 11075R-2 |  | | | | |  | | | | |
| *dsx* | 11094R-1 |  | | | | |  | | | | |
|  | 11094R-9 |  | | | | |  | | | | |
| *mus101* | 11156R-1 |  | | | | |  | | | | |
|  | 11156R-3 |  | | | | |  | | | | |
| *cup* | 11181R-1 |  | | | | |  | | | | |
|  | 11181R-3 |  | | | | |  | | | | |
| *Dcp1* | 11183R-1 |  | | | | |  | | | | |
|  | 11183R-2 |  | | | | |  | | | | |
| *mael* | 11254R-1 |  | | | | |  | | | | |
|  | 11254R-3 |  | | | | |  | | | | |
| *enok* | 11290R-1 |  | | | | |  | | | | |
|  | 11290R-4 |  | | | | |  | | | | |
| *Spn27A* | 11331R-1 |  | | | | |  | | | | |
|  | 11331R-3 |  | | | | |  | | | | |
| *png* | 11420R-1 |  | | | | |  | | | | |
|  | 11420R-3 |  | | | | |  | | | | |
| *armi* | 11513R-2 |  | | | | |  | | | | |
| *br* | 11491R-1 |  | | | | |  | | | | |
|  | 11491R-3 |  | | | | |  | | | | |
| *yuri* | 11860R-1 |  | | | | |  | | | | |
|  | 11860R-2 |  | | | | |  | | | | |
| *Slbp* | 11886R-3 |  | | | | |  | | | | |
| *CG11971* | 11971R-1 |  | | | | |  | | | | |
|  | 11971R-3 |  | | | | |  | | | | |
| *mxc* | 12058R-1 |  | | | | |  | | | | |
| *wts* | 12072R-1 |  | | | | |  | | | | |
|  | 12072R-2 |  | | | | | x | | | | |
| *pUf68* | 12085R-2 |  | | | | | x | | | | |
|  | 12085R-4 |  | | | | | x | | | | |
| *spn-F* | 12114R-1 |  | | | | |  | | | | |
|  | 12114R-4 |  | | | | |  | | | | |
| *amx* | 12127R-1 |  | | | | | x | | | | |
|  | 12127R-4 |  | | | | | x | | | | |
| *Incenp* | 12165R-1 |  | | | | |  | | | | |
|  | 12165R-3 | X | | | | |  | | | | |
| *egg* | 12196R-1 |  | | | | |  | | | | |
|  | 12196R-4 |  | | | | |  | | | | |
| *mei-P26* | 12218R-1 |  | | | | |  | | | | |
|  | 12218R-3 |  | | | | |  | | | | |
| *e(y)3* | 12238R-2 |  | | | | |  | | | | |
|  | 12238R-3 | X | | | | |  | | | | |
| *th* | 12284R-2 |  | | | | |  | | | | |
| *sub* | 12298R-3 |  | | | | |  | | | | |
| *polo* | 12306R-2 |  | | | | |  | | | | |
|  | 12306R-3 |  | | | | |  | | | | |
| *CG12340* | 12340R-1 |  | | | | |  | | | | |
|  | 12340R-3 |  | | | | |  | | | | |
| *Mad* | 12399R-1 |  | | | | |  | | | | |
|  | 12399R-2 |  | | | | |  | | | | |
| *trol* | 12497R-1 |  | | | | |  | | | | |
| *pav* | 1258R-1 |  | | | | |  | | | | |
|  | 1258R-3 |  | | | | |  | | | | |
| *otu* | 12743R-1 |  | | | | |  | | | | |
|  | 12743R-3 |  | | | | |  | | | | |
| *sle* | 12819R-1 |  | | | | |  | | | | |
|  | 12819R-3 |  | | | | |  | | | | |
| *CG12996* | 12996R-2 |  | | | | | x | | | | |
|  | 12996R-3 |  | | | | |  | | | | |
| *MCPH1* | 13184R-1 |  | | | | |  | | | | |
|  | 13184R-2 |  | | | | |  | | | | |
| *CG13190* | 13190R-3 |  | | | | |  | | | | |
|  | 13190R-4 |  | | | | |  | | | | |
| *shd* | 13478R-2 |  | | | | |  | | | | |
| *yl* | 1372R-1 |  | | | | |  | | | | |
|  | 1372R-2 |  | | | | |  | | | | |
| *CG13879* | 13879R-2 |  | | | | |  | | | | |
|  | 13879R-3 |  | | | | |  | | | | |
| *stg* | 1395R-1 |  | | | | |  | | | | |
|  | 1395R-2 |  | | | | |  | | | | |
| *tkv* | 14026R-1 |  | | | | | x | | | | |
|  | 14026R-3 |  | | | | |  | | | | |
| *vri* | 14029R-1 |  | | | | |  | | | | |
|  | 14029R-3 |  | | | | |  | | | | |
| *CG14035* | 14035R-1 |  | | | | |  | | | | |
|  | 14035R-3 |  | | | | |  | | | | |
| *Mer* | 14228R-1 |  | | | | |  | | | | |
|  | 14228R-2 |  | | | | |  | | | | |
| *Mef2* | 1429R-1 |  | | | | | x | | | | |
|  | 1429R-3 |  | | | | | x | | | | |
| *Vps25* | 14750R-2 |  | | | | |  | | | | |
|  | 14750R-3 | X | | | | |  | | | | |
| *sta* | 14792R-1 |  | | | | | X | | | | |
|  | 14792R-2 |  | | | | | X | | | | |
| *CSN5* | 14884R-1 |  | | | | |  | | | | |
|  | 14884R-3 | X | | | | |  | | | | |
| *esc* | 14941R-1 |  | | | | |  | | | | |
|  | 14941R-2 |  | | | | |  | | | | |
| *mip40* | 15119R-1 |  | | | | |  | | | | |
|  | 15119R-3 |  | | | | |  | | | | |
| *CkIIbeta* | 15224R-1 |  | | | | |  | | | | |
|  | 15224R-2 |  | | | | |  | | | | |
| *sn* | 1536R-4 |  | | | | |  | | | | |
| *hdc* | 15532R-1 |  | | | | |  | | | | |
|  | 15532R-2 |  | | | | | X | | | | |
| *RpII215* | 1554R-1 |  | | | | | | |  | | |
|  | 1554R-3 |  | | | | | | |  | | |
| *mod(mdg4)* | 15802R-3 |  | | | | | | |  | | |
|  | 32491R-1 |  | | | | | | |  | | |
|  | 32491R-2 |  | | | | | | |  | | |
|  | 7836R-1 |  | | | | | | |  | | |
|  | 7836R-2 |  | | | | | | |  | | |
| *tra* | 16724R-2 | X | | | | | | |  | | |
|  | 16724R-3 |  | | | | | | |  | | |
| *Smn* | 16725R-2 |  | | | | | | |  | | |
|  | 16725R-3 |  | | | | | | |  | | |
| *mre11* | 16928R-1 |  | | | | | | |  | | |
| *sesB* | 16944R-1 |  | | | | | | | X | | |
|  | 16944R-2 |  | | | | | | | X | | |
| *CG34438* | 17054R-2 |  | | | | | | |  | | |
|  | 17054R-3 |  | | | | | | |  | | |
| *CG17090* | 17090R-1 |  | | | | | | | X | | |
|  | 17090R-2 |  | | | | | | |  | | |
| *grp* | 17161R-1 |  | | | | | | |  | | |
|  | 17161R-2 |  | | | | | | |  | | |
| *RpL15* | 17420R-2 |  | | | | | | | X | | |
|  | 17420R-3 |  | | | | | | |  | | |
| *wds* | 17437R-1 |  | | | | | | |  | | |
|  | 17437R-3 |  | | | | | | |  | | |
| *gammaTub37C* | 17566R-1 |  | | | | | | |  | | |
| *Taf1* | 17603R-2 |  | | | | | | |  | | |
| *grk* | 17610R-2 |  | | | | | | |  | | |
|  | 17610R-4 |  | | | | | | |  | | |
| *EcR* | 1765R-2 |  | | | | | | | X | | |
|  | 1765R-4 |  | | | | | | | X | | |
| *dia* | 1768R-1 |  | | | | | | |  | | |
|  | 1768R-3 |  | | | | | | |  | | |
| *pho* | 17743R-1 |  | | | | | | |  | | |
|  | 17743R-4 |  | | | | | | |  | | |
| *cnc* | 17894R-3 |  | | | | | | |  | | |
| *Gprk2* | 17998R-1 |  | | | | | | |  | | |
|  | 17998R-3 |  | | | | | | |  | | |
| *ras* | 1799R-2 | X | | | | | | |  | | |
|  | 1799R-3 | X | | | | | | |  | | |
| *sw* | 18000R-1 |  | | | | | | |  | | |
| *ca* | 18133R-1 |  | | | | | | |  | | |
|  | 18133R-2 |  | | | | | | |  | | |
| *trio* | 18214R-1 |  | | | | | | |  | | |
|  | 18214R-2 |  | | | | | | |  | | |
| *Msp-300* | 18251R-2 |  | | | | | | |  | | |
|  | 18251R-3 |  | | | | | | |  | | |
|  | 18252R-1 |  | | | | | | |  | | |
|  | 18252R-2 |  | | | | | | |  | | |
|  | 31916R-1 |  | | | | | | |  | | |
|  | 31916R-2 |  | | | | | | |  | | |
| *sxl* | 18350R-2 |  | | | | | | |  | | |
|  | 18350R-3 | X | | | | | | |  | | |
| *dsh* | 18361R-2 |  | | | | | | | X | | |
|  | 18361R-3 |  | | | | | | |  | | |
| *zwilch* | 18729R-1 |  |  | | | | | | | | |
|  | 18729R-2 |  |  | | | | | | | | |
| *lin19* | 1877R-1 |  |  | | | | | | | | |
| *sax* | 1891R-1 |  |  | | | | | | | | |
|  | 1891R-3 |  |  | | | | | | | | |
| *sno* | 1903R-2 |  |  | | | | | | | | |
|  | 1903R-3 |  |  | | | | | | | | |
| *faf* | 1945R-1 |  |  | | | | | | | | |
|  | 1945R-2 |  |  | | | | | | | | |
| *ci* | 2125R-1 |  |  | | | | | | | | |
|  | 2125R-2 |  |  | | | | | | | | |
| *v* | 2155R-1 |  |  | | | | | | | | |
|  | 2155R-2 |  |  | | | | | | | | |
| *RpS3A* | 2168R-2 |  | X | | | | | | | | |
|  | 2168R-3 |  |  | | | | | | | | |
| *psq* | 2368R-1 |  |  | | | | | | | | |
|  | 2368R-2 |  |  | | | | | | | | |
| *ptc* | 2411R-1 |  | X | | | | | | | | |
| *Hus1-like* | 2525R-1 |  |  | | | | | | | | |
| *Fs(2)Ket* | 2637R-1 |  | X | | | | | | | | |
|  | 2637R-3 |  | X | | | | | | | | |
| *lds* | 2684R-1 |  |  | | | | | | | | |
| *fs(1)Ya* | 2707R-1 |  |  | | | | | | | | |
|  | 2707R-3 |  |  | | | | | | | | |
| *crm* | 2714R-2 |  |  | | | | | | | | |
|  | 2714R-3 |  |  | | | | | | | | |
| *Gs1* | 2718R-1 |  |  | | | | | | | | |
|  | 2718R-3 |  |  | | | | | | | | |
| *tlk* | 2829R-1 |  | X | | | | | | | | |
|  | 2829R-3 |  | X | | | | | | | | |
| *Prat* | 2867R-1 |  |  | | | | | | | | |
|  | 2867R-2 |  |  | | | | | | | | |
| *exba* | 2922R-1 |  |  | | | | | | | | |
|  | 2922R-2 |  |  | | | | | | | | |
| *noi* | 2925R-2 |  |  | | | | | | | | |
|  | 2925R-3 |  | X | | | | | | | | |
| *Yp1* | 2985R-1 |  |  | | | | | | | | |
|  | 2985R-2 |  |  | | | | | | | | |
| *bgcn* | 30170R-1 |  |  | | | | | | | | |
|  | 30170R-2 |  |  | | | | | | | | |
| *CG30475* | 30475R-1 |  | X | | | | | | | | |
|  | 30475R-3 |  | X | | | | | | | | |
| *colt* | 3057R-1 |  |  | | | | | | | | |
|  | 3057R-2 |  |  | | | | | | | | |
| *mr* | 3060R-2 |  |  | | | | | | | | |
|  | 3060R-3 |  |  | | | | | | | | |
| *Doa* | 31049R-1 |  |  | | | | | | | | |
|  | 31049R-3 |  | X | | | | | | | | |
| *14-3-3epsilon* | 31196R-3 |  |  | | | | | | | | |
|  | 31196R-4 |  |  | | | | | | | | |
| *Rbp9* | 3151R-1 |  |  | | | | | | | | |
|  | 3151R-2 |  |  | | | | | | | | |
| *spn-E* | 3158R-1 |  |  | | | | | | | | |
|  | 3158R-2 |  |  | | | | | | | | |
| *aop* | 3166R-1 |  | | | | | | | | |  |
|  | 3166R-3 |  | | | | | | | | |  |
| *MAN1* | 3167R-1 |  | | | | | | | | |  |
|  | 3167R-4 |  | | | | | | | | |  |
| *Tre1* | 3171R-2 |  | | | | | | | | |  |
|  | 3171R-3 |  | | | | | | | | |  |
| *yuri* | 31732R-1 |  | | | | | | | | |  |
|  | 31732R-3 |  | | | | | | | | |  |
| *Taf6* | 32211R-2 |  | | | | | | | | |  |
|  | 32211R-7 |  | | | | | | | | | X |
| *chb* | 32435R-2 |  | | | | | | | | |  |
|  | 32435R-3 |  | | | | | | | | |  |
| *sced* | 3273R-2 |  | | | | | | | | |  |
|  | 3273R-3 |  | | | | | | | | |  |
| *grau* | 3282R-1 |  | | | | | | | | |  |
|  | 3282R-3 |  | | | | | | | | |  |
| *betaTub60D* | 3401R-1 |  | | | | | | | | | X |
|  | 3401R-3 |  | | | | | | | | |  |
| *path* | 3424R-1 |  | | | | | | | | |  |
|  | 3424R-2 |  | | | | | | | | |  |
| *vir* | 3496R-2 |  | | | | | | | | |  |
|  | 3496R-3 | X | | | | | | | | |  |
| *CycB* | 3510R-1 |  | | | | | | | | |  |
|  | 3510R-3 |  | | | | | | | | |  |
| *U2af38* | 3582R-2 |  | | | | | | | | | X |
|  | 3582R-3 |  | | | | | | | | |  |
| *bic* | 3644R-1 |  | | | | | | | | | X |
|  | 3644R-3 |  | | | | | | | | | X |
| *Shc* | 3715R-1 |  | | | | | | | | |  |
|  | 3715R-2 |  | | | | | | | | |  |
| *Pgd* | 3724R-1 |  | | | | | | | | |  |
|  | 3724R-2 |  | | | | | | | | |  |
| *csul* | 3730R-1 |  | | | | | | | | |  |
|  | 3730R-3 |  | | | | | | | | |  |
| *Chd1* | 3733R-2 |  | | | | | | | | |  |
|  | 3733R-3 |  | | | | | | | | |  |
| *esg* | 3758R-1 |  | | | | | | | | | X |
|  | 3758R-5 |  | | | | | | | | |  |
| *sc* | 3827R-2 |  | | | | | | | | |  |
|  | 3827R-3 |  | | | | | | | | |  |
| *stwl* | 3836R-2 |  | | | | | | | | |  |
|  | 3836R-3 |  | | | | | | | | |  |
| *Oamb* | 3856R-2 |  | | | | | | | | |  |
| *RpS17* | 3922R-1 |  | | | | | | | | | X |
|  | 3922R-2 |  | | | | | | | | | X |
| *al* | 3935R-1 |  | | | | | | | | |  |
| *N* | 3936R-2 |  | | | | | | | | |  |
|  | 3936R-3 |  | | | | | | | | | X |
| *cher* | 3937R-2 |  | | | | | | | | | X |
|  | 3937R-4 |  | | | | | | | | |  |
| *CycE* | 3938R-2 |  | | | | | | | | | X |
|  | 3938R-3 |  | | | | | | | | |  |
| *pelo* | 3959R-2 |  | | | | | | | | |  |
|  | 3959R-3 |  | | | | | | | | |  |
| *zf30C* | 3998R-1 |  | | | |  | | | | | |
|  | 3998R-2 |  | | | |  | | | | | |
| *Akt1* | 4006R-1 |  | | | | X | | | | | |
|  | 4006R-3 |  | | | | X | | | | | |
| *eIF-4E* | 4035R-1 |  | | | |  | | | | | |
| *tamo* | 4057R-2 |  | | | |  | | | | | |
|  | 4057R-3 |  | | | |  | | | | | |
| *ebi* | 4063R-2 |  | | | |  | | | | | |
|  | 4063R-4 |  | | | |  | | | | | |
| *l(2)35Df* | 4152R-2 |  | | | |  | | | | | |
| *vig* | 4170R-1 |  | | | |  | | | | | |
|  | 4170R-3 |  | | | |  | | | | | |
| *elav* | 4262R-1 |  | | | | X | | | | | |
|  | 4262R-4 |  | | | | X | | | | | |
| *st* | 4314R-1 |  | | | |  | | | | | |
|  | 4314R-3 |  | | | |  | | | | | |
| *Pink1* | 4523R-3 |  | | | |  | | | | | |
|  | 4523R-4 |  | | | |  | | | | | |
| *SCAR* | 4636R-1 |  | | | |  | | | | | |
| *Wnt4* | 4698R-2 | X | | | |  | | | | | |
|  | 4698R-3 |  | | | |  | | | | | |
| *BicC* | 4824R-3 |  | | | |  | | | | | |
|  | 4824R-5 |  | | | |  | | | | | |
| *cnn* | 4832R-1 |  | | | |  | | | | | |
|  | 4832R-2 |  | | | |  | | | | | |
| *twe* | 4965R-1 |  | | | |  | | | | | |
|  | 4965R-2 |  | | | |  | | | | | |
| *msps* | 5000R-3 |  | | | | X | | | | | |
| *pim* | 5052R-1 |  | | | |  | | | | | |
|  | 5052R-2 |  | | | |  | | | | | |
| *baz* | 5055R-1 |  | | | |  | | | | | |
|  | 5055R-2 |  | | | |  | | | | | |
| *capt* | 5061R-2 |  | | | |  | | | | | |
|  | 5061R-4 |  | | | |  | | | | | |
| *Cdk4* | 5072R-3 |  | | | |  | | | | | |
|  | 5072R-4 |  | | | |  | | | | | |
| *Tor* | 5092R-1 |  | | | |  | | | | | |
|  | 5092R-2 |  | | | |  | | | | | |
| *Dp1* | 5170R-1 |  | | | |  | | | | | |
|  | 5170R-3 |  | | | |  | | | | | |
| *RpS27A* | 5271R-3 |  | | | | X | | | | | |
|  | 5271R-7 |  | | | | X | | | | | |
| *CG5360* | 5360R-1 |  | | | | X | | | | | |
|  | 5360R-3 |  | | | | X | | | | | |
| *Dcp-1* | 5370R-1 |  | | | |  | | | | | |
|  | 5370R-2 |  | | | |  | | | | | |
| *lrrk* | 5483R-2 |  | | | |  | | | | | |
|  | 5483R-4 |  | | | |  | | | | | |
| *sqz* | 5557R-1 |  | | | | X | | | | | |
|  | 5557R-2 |  | | | | X | | | | | |
| *gbb* | 5562R-1 |  | | | |  | | | | | |
|  | 5562R-3 |  | | | |  | | | | | |
| *Ote* | 5581R-3 |  | | | |  | | | | | |
| *trk* | 5619R-1 |  | | | |  | | | | | |
|  | 5619R-3 |  | | |  | | | | | | |
| *CG5629* | 5629R-1 |  | | |  | | | | | | |
|  | 5629R-3 |  | | |  | | | | | | |
| *Grip163* | 5688R-1 |  | | |  | | | | | | |
|  | 5688R-3 |  | | |  | | | | | | |
| *yellow-g* | 5717R-1 |  | | |  | | | | | | |
| *rtet* | 5760R-1 |  | | |  | | | | | | |
|  | 5760R-2 |  | | |  | | | | | | |
| *Gp150* | 5820R-2 |  | | |  | | | | | | |
|  | 5820R-3 |  | | |  | | | | | | |
| *cact* | 5848R-1 |  | | |  | | | | | | |
|  | 5848R-3 |  | | |  | | | | | | |
| *beta-Spec* | 5870R-1 |  | | |  | | | | | | |
|  | 5870R-3 |  | | |  | | | | | | |
| *D* | 5893R-1 |  | | |  | | | | | | |
| *sop* | 5920R-1 |  | | | X | | | | | | |
|  | 5920R-2 |  | | | X | | | | | | |
| *l(3)mbt* | 5954R-1 |  | | |  | | | | | | |
|  | 5954R-2 |  | | |  | | | | | | |
| *woc* | 5965R-1 |  | | |  | | | | | | |
|  | 5965R-2 |  | | |  | | | | | | |
| *pll* | 5974R-1 |  | | |  | | | | | | |
|  | 5974R-3 |  | | |  | | | | | | |
| *os* | 5993R-1 |  | | |  | | | | | | |
|  | 5993R-2 |  | | |  | | | | | | |
| *mip120* | 6061R-1 |  | | |  | | | | | | |
|  | 6061R-4 |  | | |  | | | | | | |
| *abo* | 6093R-1 |  | | |  | | | | | | |
|  | 6093R-3 |  | | |  | | | | | | |
| *CG33528* | 6119R-1 |  | | |  | | | | | | |
| *Grip75* | 6176R-2 |  | | |  | | | | | | |
| *tws* | 6235R-1 |  | | |  | | | | | | |
|  | 6235R-2 |  | | |  | | | | | | |
| *JIL-1* | 6297R-1 |  | | |  | | | | | | |
|  | 6297R-4 |  | | |  | | | | | | |
| *l(3)01239* | 6302R-1 |  | | |  | | | | | | |
|  | 6302R-2 |  | | |  | | | | | | |
| *ball* | 6386R-1 |  | | |  | | | | | | |
| *qua* | 6433R-3 |  | | |  | | | | | | |
|  | 6433R-4 |  | | |  | | | | | | |
| *e(y)1* | 6474R-1 |  | | |  | | | | | | |
|  | 6474R-2 | X | | |  | | | | | | |
| *E(z)* | 6502R-3 |  | | |  | | | | | | |
|  | 6502R-4 |  | | |  | | | | | | |
| *endos* | 6513R-1 |  | | |  | | | | | | |
|  | 6513R-3 |  | | |  | | | | | | |
| *pps* | 6525R-3 |  | | |  | | | | | | |
|  | 6525R-4 |  | | |  | | | | | | |
| *tefu* | 6535R-1 |  | | |  | | | | | | |
|  | 6535R-2 |  | | |  | | | | | | |
| *fu* | 6551R-2 |  | | |  | | | | | | |
|  | 6551R-3 |  | | |  | | | | | | |
| *BicD* | 6605R-1 |  | | |  | | | | | | |
|  | 6605R-2 |  | |  | | | | | | | |
| *lsn* | 6637R-1 | X | |  | | | | | | | |
|  | 6637R-2 | X | |  | | | | | | | |
| *dl* | 6667R-2 |  | |  | | | | | | | |
|  | 6667R-5 |  | |  | | | | | | | |
| *ash2* | 6677R-1 |  | |  | | | | | | | |
| *tsl* | 6705R-2 |  | |  | | | | | | | |
| *ovo* | 6824R-1 |  | |  | | | | | | | |
|  | 6824R-2 |  | |  | | | | | | | |
| *CG6921* | 6921R-2 |  | | X | | | | | | | |
| *gish* | 6963R-1 |  | |  | | | | | | | |
|  | 6963R-3 |  | |  | | | | | | | |
| *mio* | 7074R-1 |  | |  | | | | | | | |
|  | 7074R-3 |  | |  | | | | | | | |
| *Rack1* | 7111R-1 |  | |  | | | | | | | |
|  | 7111R-2 |  | |  | | | | | | | |
| *wbl* | 7225R-1 |  | |  | | | | | | | |
| *Snoo* | 7233R-1 |  | |  | | | | | | | |
|  | 7233R-4 |  | |  | | | | | | | |
| *Hsp60C* | 7235R-2 |  | |  | | | | | | | |
|  | 7235R-3 |  | |  | | | | | | | |
| *baf* | 7380R-1 |  | |  | | | | | | | |
| *Rbf* | 7413R-1 |  | |  | | | | | | | |
| *eff* | 7425R-1 |  | |  | | | | | | | |
|  | 7425R-2 | X | | X | | | | | | | |
| *RecQ4* | 7487R-2 |  | |  | | | | | | | |
|  | 7487R-3 |  | |  | | | | | | | |
| *Dhc64C* | 7507R-2 |  | | X | | | | | | | |
| *Src64B* | 7524R-1 |  | |  | | | | | | | |
|  | 7524R-3 |  | |  | | | | | | | |
| *pxt* | 7660R-2 |  | |  | | | | | | | |
|  | 7660R-4 |  | |  | | | | | | | |
| *CG7670* | 7670R-1 |  | |  | | | | | | | |
| *gwl* | 7719R-1 |  | |  | | | | | | | |
|  | 7719R-2 |  | |  | | | | | | | |
| *fat2* | 7749R-1 |  | |  | | | | | | | |
|  | 7749R-3 |  | |  | | | | | | | |
| *Tfb2* | 7764R-2 |  | |  | | | | | | | |
| *Bub1* | 7838R-1 |  | |  | | | | | | | |
| *PNGase* | 7865R-1 |  | |  | | | | | | | |
|  | 7865R-2 |  | |  | | | | | | | |
| *snk* | 7996R-2 |  | |  | | | | | | | |
|  | 7996R-3 |  | |  | | | | | | | |
| *Nc* | 8091R-1 |  | |  | | | | | | | |
|  | 8091R-2 |  | |  | | | | | | | |
| *mam* | 8118R-1 |  | |  | | | | | | | |
| *dup* | 8171R-2 |  | | X | | | | | | | |
|  | 8171R-3 |  | | X | | | | | | | |
| *alphaTub67C* | 8308R-2 |  | | X | | | | | | | |
|  | 8308R-3 |  | | X | | | | | | | |
| *ap* | 8376R-1 |  | |  | | | | | | | |
|  | 8376R-2 |  | |  | | | | | | | |
| *gro* | 8384R-2 |  | |  | | | | | | | |
|  | 8384R-4 |  | | | | | | | |  | |
| *gcl* | 8411R-2 |  | | | | | | | |  | |
|  | 8411R-3 |  | | | | | | | |  | |
| *su(Hw)* | 8573R-2 | X | | | | | | | |  | |
|  | 8573R-3 |  | | | | | | | |  | |
| *Klp3A* | 8590R-2 |  | | | | | | | |  | |
|  | 8590R-3 |  | | | | | | | |  | |
| *stil* | 8592R-1 |  | | | | | | | |  | |
|  | 8592R-4 |  | | | | | | | |  | |
| *lark* | 8597R-1 |  | | | | | | | |  | |
|  | 8597R-2 |  | | | | | | | |  | |
| *Iswi* | 8625R-1 |  | | | | | | | |  | |
|  | 8625R-2 |  | | | | | | | |  | |
| *Hr39* | 8676R-2 |  | | | | | | | |  | |
|  | 8676R-3 |  | | | | | | | |  | |
| *Nacalpha* | 8759R-1 |  | | | | | | | | X | |
|  | 8759R-3 |  | | | | | | | |  | |
| *tsu* | 8781R-1 | X | | | | | | | |  | |
|  | 8781R-2 | X | | | | | | | |  | |
| *wun* | 8804R-1 |  | | | | | | | |  | |
|  | 8804R-3 |  | | | | | | | |  | |
| *wun2* | 8805R-1 |  | | | | | | | |  | |
|  | 8805R-3 |  | | | | | | | |  | |
| *SCOX* | 8885R-2 |  | | | | | | | |  | |
|  | 8885R-3 |  | | | | | | | |  | |
| *Psi* | 8912R-1 |  | | | | | | | |  | |
|  | 8912R-3 |  | | | | | | | | X | |
| *exu* | 8994R-1 |  | | | | | | | |  | |
|  | 8994R-2 |  | | | | | | | |  | |
| *Vm26Ab* | 9046R-1 |  | | | | | | | |  | |
|  | 9046R-2 |  | | | | | | | |  | |
| *ade2* | 9127R-1 |  | | | | | | | |  | |
|  | 9127R-2 |  | | | | | | | |  | |
| *mus209* | 9193R-1 |  | | | | | | | | X | |
|  | 9193R-3 |  | | | | | | | | X | |
| *Grip128* | 9201R-2 |  | | | | | | | |  | |
|  | 9201R-3 |  | | | | | | | |  | |
| *sm* | 9218R-1 |  | | | | | | | |  | |
|  | 9218R-2 |  | | | | | | | |  | |
| *hts* | 9325R-1 |  | | | | | | | |  | |
|  | 9325R-3 |  | | | | | | | |  | |
| *Trl* | 9343R-1 |  | | | | | | | |  | |
|  | 9343R-2 |  | | | | | | | |  | |
| *Taf6* | 9348R-1 |  | | | | | | | |  | |
|  | 9348R-2 |  | | | | | | | |  | |
| *m* | 9369R-1 |  | | | | | | | |  | |
|  | 9369R-2 |  | | | | | | | |  | |
| *Ras85D* | 9375R-1 |  | | | | | | | | X | |
|  | 9375R-3 | X | | | | | | | |  | |
| *by* | 9379R-2 |  | | | | | | | |  | |
|  | 9379R-3 |  | | | | | | | |  | |
| *asf1* | 9383R-1 |  | | | | | | | | X | |
|  | 9383R-2 |  | | | | | | | | X | |
| *rin* | 9412R-1 |  | | | | | | | |  | |
|  | 9412R-2 |  | | | | | |  | | | |
| *Pu* | 9441R-1 |  | | | | | |  | | | |
|  | 9441R-2 |  | | | | | |  | | | |
| *coro* | 9446R-1 |  | | | | | |  | | | |
|  | 9446R-2 |  | | | | | |  | | | |
| *tud* | 9450R-3 |  | | | | | |  | | | |
| *hyd* | 9484R-1 |  | | | | | |  | | | |
|  | 9484R-2 |  | | | | | |  | | | |
| *Gef26* | 9491R-2 |  | | | | | |  | | | |
|  | 9491R-3 |  | | | | | |  | | | |
| *chic* | 9553R-3 |  | | | | | |  | | | |
| *RhoGEF2* | 9635R-2 |  | | | | | |  | | | |
|  | 9635R-3 | X | | | | | |  | | | |
| *Ada2b* | 9638R-1 |  | | | | | |  | | | |
|  | 9638R-3 |  | | | | | |  | | | |
| *dom* | 9696R-1 |  | | | | | |  | | | |
|  | 9696R-3 |  | | | | | | X | | | |
| *fz2* | 9739R-1 | X | | | | | |  | | | |
|  | 9739R-2 | X | | | | | |  | | | |
| *Dhod* | 9741R-1 |  | | | | | |  | | | |
|  | 9741R-2 |  | | | | | |  | | | |
| *rok* | 9774R-3 |  | | | | | |  | | | |
| *CG9793* | 9793R-1 |  | | | | | |  | | | |
|  | 9793R-3 |  | | | | | |  | | | |
| *dpp* | 9885R-1 |  | | | | | |  | | | |
| *mit(1)15* | 9900R-3 |  | | | | | |  | | | |
| *sina* | 9949R-1 |  | | | | | |  | | | |
|  | 9949R-2 |  | | | | | |  | | | |
